# Supplementary material for: Magnetic cations doped into a double perovskite semiconductor
Source: Royal Society of Chemistry journal article supplement (doi:10.1039/d1tc05585b), 2022-01-01
Supplement: d1tc05585b1.pdf [file d1tc05585b1.pdf]

## Supporting Information

### Magnetic cations doped into a Double Perovskite Semiconductor

Lun Jin<sup>1\*</sup>, Danrui Ni<sup>1</sup>, Xin Gui<sup>1</sup>, Daniel B. Straus<sup>1</sup>, Qiang Zhang<sup>2</sup> and Robert J. Cava<sup>1\*</sup>

<sup>1</sup>Department of Chemistry, Princeton University, Princeton, NJ, 08544, USA

<sup>2</sup>Neutron Scattering Division, Oak Ridge National Laboratory, Oak Ridge, TN, 37831, USA

\*E-mails of corresponding authors: [ljin@princeton.edu](mailto:ljin@princeton.edu); [rcava@princeton.edu](mailto:rcava@princeton.edu)

### Table of Contents

#### 1. Rietveld co-refinement of ambient temperature neutron and X-ray powder diffraction data

**Figure S1.** Observed, calculated and difference plots from the Rietveld co-refinement of  $\text{Sr}_2\text{GaSbO}_6$  (space group  $I4/m$ ) against neutron (top) and X-ray (bottom) powder diffraction data collected at 300 K.

**Table S1.** Structural parameters and crystallographic positions from the co-refinement of neutron and X-ray powder diffraction data collected from  $\text{Sr}_2\text{GaSbO}_6$  at 300 K.

**Figure S2.** Observed, calculated and difference plots from the Rietveld co-refinement of  $\text{Sr}_2\text{Ga}_{0.9}\text{Cr}_{0.1}\text{SbO}_6$  (top) and  $\text{Sr}_2\text{Ga}_{0.9}\text{Fe}_{0.1}\text{SbO}_6$  (bottom) in space group  $I4/m$  against X-ray powder diffraction data collected at 300 K.

**Table S2** Selected bond lengths for the double perovskites from the Rietveld co-refinement of neutron and X-ray powder diffraction data.

#### 2. Scanning Electron Microscope Characterization

**Figure S3.** The FEI XL30 field-emission gun scanning electron microscope (SEM) photos of particle morphology of (a)-(b)  $\text{Sr}_2\text{Ga}_{0.9}\text{M}_{0.1}\text{SbO}_6$  ( $\text{M} = \text{Cr/Fe}$ ), (c)-(d)  $\text{Sr}_2\text{Ga}_{0.6}\text{M}_{0.4}\text{SbO}_6$  ( $\text{M} = \text{Cr/Fe}$ ).

#### 3. Magnetization data collected from the $\text{Sr}_2\text{Ga}_{1-x}\text{M}_x\text{SbO}_6$ series ( $\text{M} = \text{Cr/Fe}$ )

**Table S3.** The Curie constant and Weiss temperature extracted from the fitting of paramagnetic susceptibility to the Curie-Weiss law, the observed effective moment per formula unit, and the calculated effective moment per formula unit predicted based on the spin-only formula for each composition of  $\text{Sr}_2\text{Ga}_{1-x}\text{M}_x\text{SbO}_6$  series ( $\text{M} = \text{Cr/Fe}$ ).

**Figure S4.** The magnetization data collected from  $\text{Sr}_2\text{Ga}_{0.9}\text{Cr}_{0.1}\text{SbO}_6$ .

**Figure S5.** The magnetization data collected from  $\text{Sr}_2\text{Ga}_{0.8}\text{Cr}_{0.2}\text{SbO}_6$ .

**Figure S6.** The magnetization data collected from  $\text{Sr}_2\text{Ga}_{0.7}\text{Cr}_{0.3}\text{SbO}_6$ .

**Figure S7.** The magnetization data collected from  $\text{Sr}_2\text{Ga}_{0.6}\text{Cr}_{0.4}\text{SbO}_6$ .

**Figure S8.** The magnetization data collected from  $\text{Sr}_2\text{Ga}_{0.9}\text{Fe}_{0.1}\text{SbO}_6$ .

**Figure S9.** The magnetization data collected from  $\text{Sr}_2\text{Ga}_{0.8}\text{Fe}_{0.2}\text{SbO}_6$ .

**Figure S10.** The magnetization data collected from  $\text{Sr}_2\text{Ga}_{0.7}\text{Fe}_{0.3}\text{SbO}_6$ .

**Figure S11.** The magnetization data collected from  $\text{Sr}_2\text{Ga}_{0.6}\text{Fe}_{0.4}\text{SbO}_6$ .

#### **4. The calculated band gaps for all the double perovskites prepared in this study**

**Table S4.** The calculated band gaps from Tauc plot by using both indirect and direct transition equation for all the double perovskites prepared in this study.

# 1. Rietveld co-refinement of ambient temperature neutron and X-ray powder diffraction data

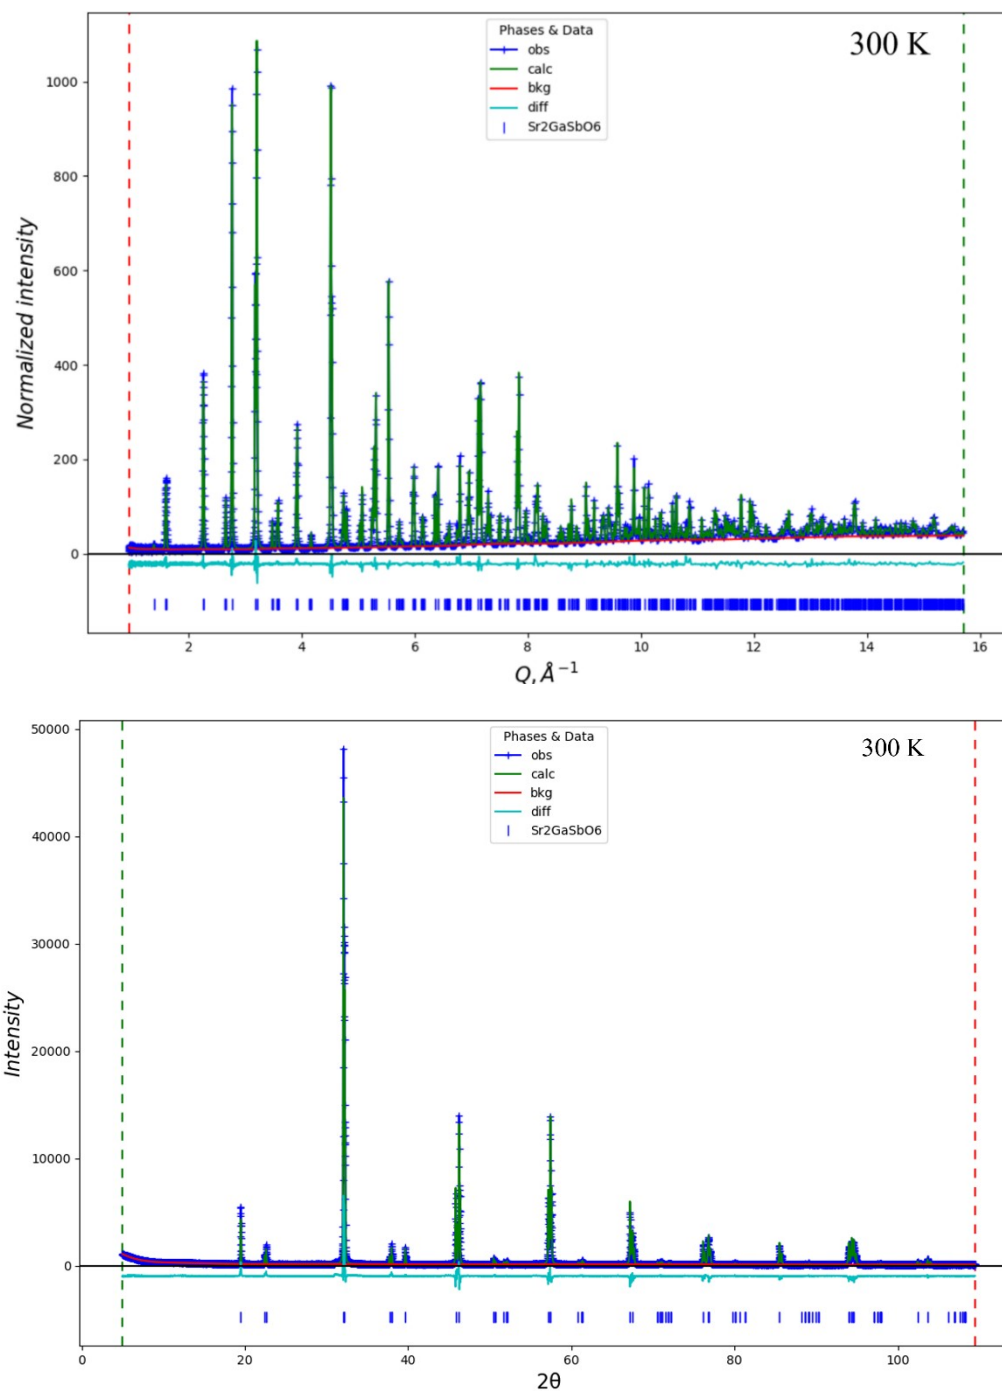

**Figure S1.** Observed, calculated and difference plots from the Rietveld co-refinement of  $\text{Sr}_2\text{GaSbO}_6$  (space group  $I4/m$ ) against neutron (top) and X-ray (bottom) powder diffraction data collected at 300 K.

| Atoms | $x/a$     | $y/b$     | $z/c$     | S.O.F. | $U_{\text{iso}}$ equiv.<br>( $\text{\AA}^2$ ) |
|-------|-----------|-----------|-----------|--------|-----------------------------------------------|
| Sr1   | 0         | 0.5       | 0.25      | 1      | 0.00628                                       |
| Ga1   | 0         | 0         | 0         | 1      | 0.00068                                       |
| Sb1   | 0.5       | 0.5       | 0         | 1      | 0.00503                                       |
| O1    | 0         | 0         | 0.2495(3) | 1      | 0.00967                                       |
| O2    | 0.2243(3) | 0.2771(3) | 0         | 1      | 0.00773                                       |

$\text{Sr}_2\text{GaSbO}_6$  space group  $I4/m$  (#87)

Formula weight: 462.72 g mol<sup>-1</sup>,  $Z = 2$

$a = 5.54042(4)$   $\text{\AA}$ ,  $c = 7.90283(4)$   $\text{\AA}$ , Volume = 242.587(5)  $\text{\AA}^3$

Radiation source: time of flight neutrons and Cu K- $\alpha$

Temperature: 300 K

$wR = 7.303\%$ ;  $GOF = 3.01$

**Table S1.** Structural parameters and crystallographic positions from the co-refinement of neutron and X-ray powder diffraction data collected from  $\text{Sr}_2\text{GaSbO}_6$  at 300 K.

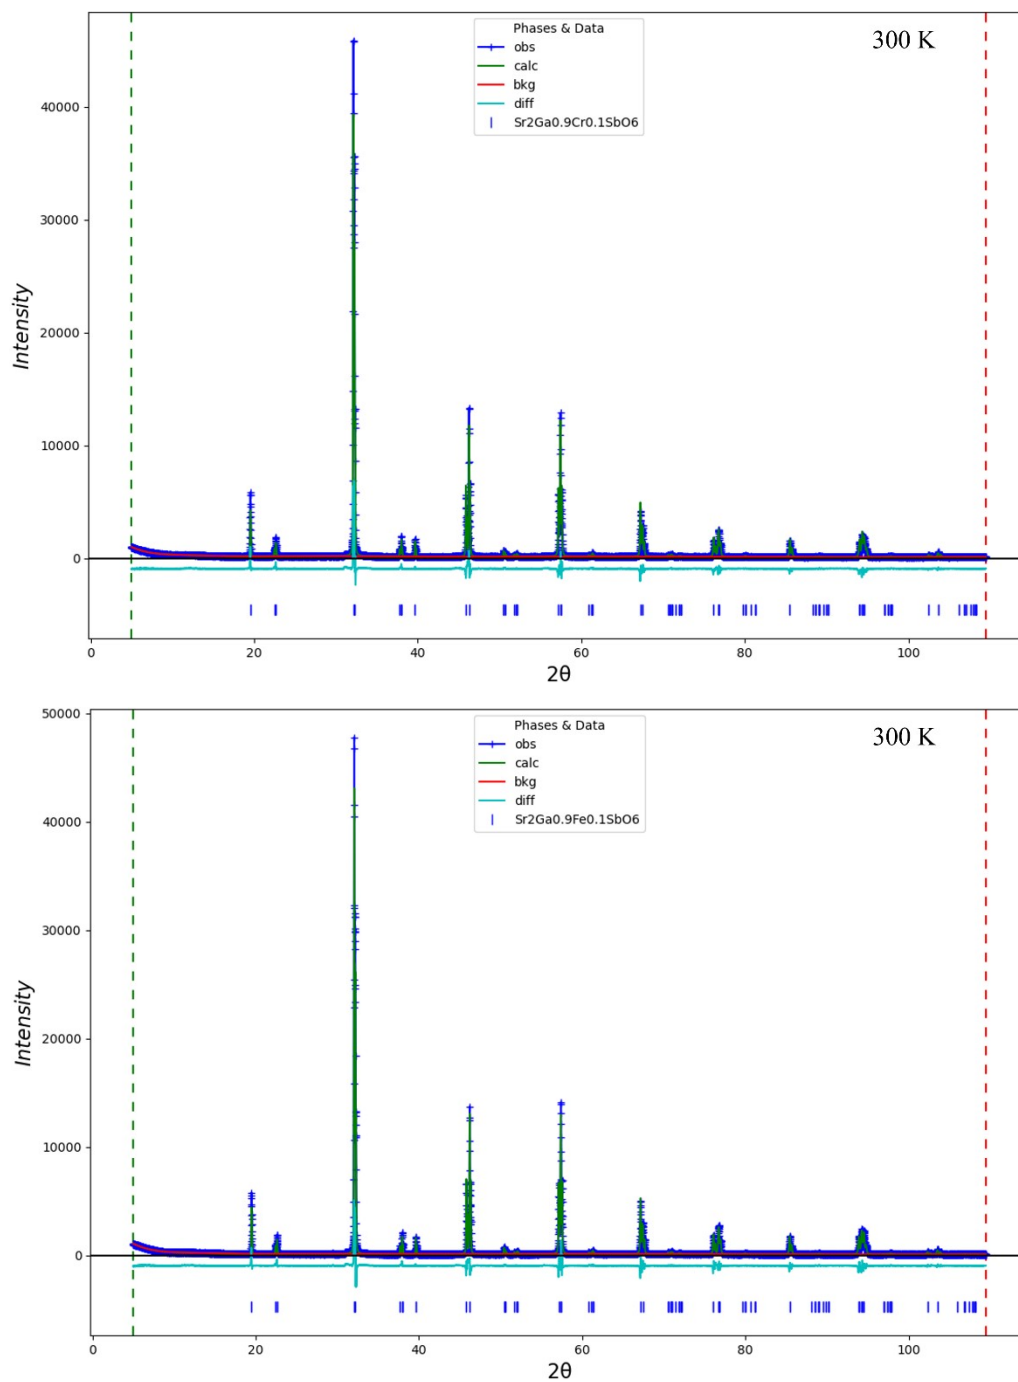

**Figure S2.** Observed, calculated and difference plots from the Rietveld co-refinement of  $\text{Sr}_2\text{Ga}_{0.9}\text{Cr}_{0.1}\text{SbO}_6$  (top) and  $\text{Sr}_2\text{Ga}_{0.9}\text{Fe}_{0.1}\text{SbO}_6$  (bottom) in space group  $I4/m$  against X-ray powder diffraction data collected at 300 K.

**Table S2** Selected bond lengths for the double perovskites from the Rietveld co-refinement of neutron and X-ray powder diffraction data.

| Undoped                                |      |                  | Doped                                                                |      |                  |
|----------------------------------------|------|------------------|----------------------------------------------------------------------|------|------------------|
| <b>Sr<sub>2</sub>GaSbO<sub>6</sub></b> |      |                  | <b>Sr<sub>2</sub>Ga<sub>0.9</sub>Cr<sub>0.1</sub>SbO<sub>6</sub></b> |      |                  |
| <b>Sr(1)</b>                           | O(1) | 2.770(1) (Å) × 4 | <b>Sr(1)</b>                                                         | O(1) | 2.772(1) (Å) × 4 |
|                                        | O(2) | 2.932(1) (Å) × 4 |                                                                      | O(2) | 2.929(1) (Å) × 4 |
|                                        | O(2) | 2.641(1) (Å) × 4 |                                                                      | O(2) | 2.645(1) (Å) × 4 |
| <b>Ga(1)</b>                           | O(1) | 1.982(1) (Å) × 2 | <b>Ga/Cr(1)</b>                                                      | O(1) | 1.972(1) (Å) × 2 |
|                                        | O(2) | 1.972(1) (Å) × 4 |                                                                      | O(2) | 1.973(1) (Å) × 4 |
| <b>Sb(1)</b>                           | O(1) | 1.971(1) (Å) × 2 | <b>Sb(1)</b>                                                         | O(1) | 1.980(1) (Å) × 2 |
|                                        | O(2) | 1.968(1) (Å) × 4 |                                                                      | O(2) | 1.969(1) (Å) × 4 |
|                                        |      |                  | <b>Sr<sub>2</sub>Ga<sub>0.9</sub>Fe<sub>0.1</sub>SbO<sub>6</sub></b> |      |                  |
|                                        |      |                  | <b>Sr(1)</b>                                                         | O(1) | 2.773(1) (Å) × 4 |
|                                        |      |                  |                                                                      | O(2) | 2.935(1) (Å) × 4 |
|                                        |      |                  |                                                                      | O(2) | 2.643(1) (Å) × 4 |
|                                        |      |                  | <b>Ga/Fe(1)</b>                                                      | O(1) | 1.969(1) (Å) × 2 |
|                                        |      |                  |                                                                      | O(2) | 1.974(1) (Å) × 4 |
|                                        |      |                  | <b>Sb(1)</b>                                                         | O(1) | 1.987(1) (Å) × 2 |
|                                        |      |                  |                                                                      | O(2) | 1.970(1) (Å) × 4 |

## 2. Scanning Electron Microscope Characterization

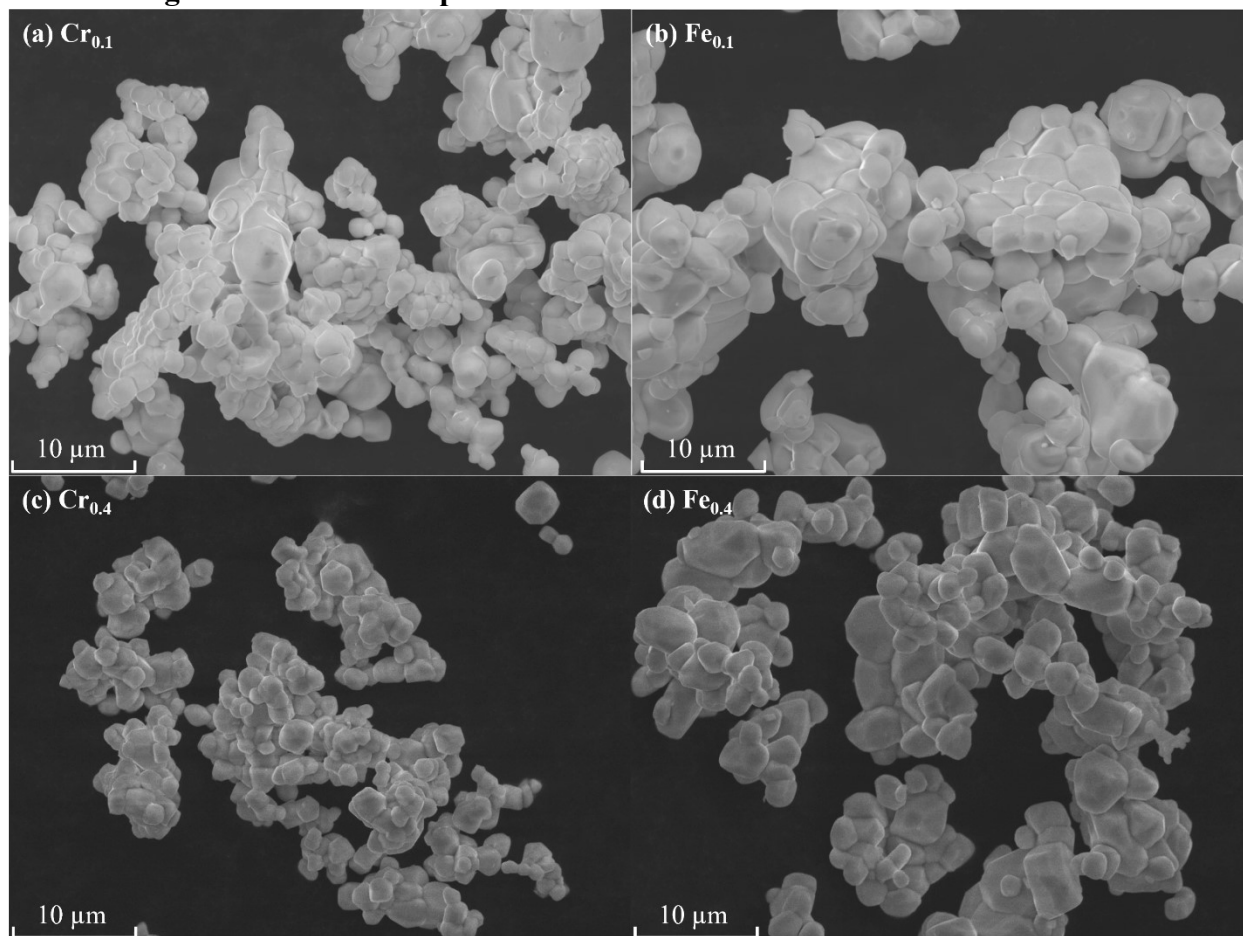

**Figure S3.** The FEI XL30 field-emission gun scanning electron microscope (SEM) photos of particle morphology of (a)-(b)  $\text{Sr}_2\text{Ga}_{0.9}\text{M}_{0.1}\text{SbO}_6$  ( $\text{M} = \text{Cr}/\text{Fe}$ ), (c)-(d)  $\text{Sr}_2\text{Ga}_{0.6}\text{M}_{0.4}\text{SbO}_6$  ( $\text{M} = \text{Cr}/\text{Fe}$ ).

### 3. Magnetization data for the $\text{Sr}_2\text{Ga}_{1-x}\text{M}_x\text{SbO}_6$ series ( $\text{M} = \text{Cr/Fe}$ ) phases

**Table S3.** The Curie constant and Weiss temperature extracted from the fitting of paramagnetic susceptibility to the Curie-Weiss law, the observed effective moment per formula unit, and the calculated effective moment per formula unit predicted based on the spin-only formula for each composition of  $\text{Sr}_2\text{Ga}_{1-x}\text{M}_x\text{SbO}_6$  series ( $\text{M} = \text{Cr/Fe}$ ).

| Composition                                                          | Curie constant<br>$C$<br>( $\text{cm}^3 \text{K mol}^{-1}$ ) | Observed<br>effective<br>moment per<br>formula unit<br>$\mu_{\text{eff.obs}} (\mu_{\text{B}}/\text{f.u.})$ | Calculated<br>effective<br>moment per<br>formula unit<br>$\mu_{\text{eff.cal}} (\mu_{\text{B}}/\text{f.u.})$ | Weiss<br>temperature<br>$\theta$<br>(K) |
|----------------------------------------------------------------------|--------------------------------------------------------------|------------------------------------------------------------------------------------------------------------|--------------------------------------------------------------------------------------------------------------|-----------------------------------------|
| <b><math>\text{Sr}_2\text{Ga}_{1-x}\text{M}_x\text{SbO}_6</math></b> |                                                              |                                                                                                            |                                                                                                              |                                         |
| <b><math>\text{M} = \text{Cr}^{3+}</math></b>                        |                                                              |                                                                                                            |                                                                                                              |                                         |
| $x = 0.1$                                                            | 0.165(3)                                                     | 1.149                                                                                                      | 1.225                                                                                                        | 0.35(5)                                 |
| $x = 0.2$                                                            | 0.365(1)                                                     | 1.709                                                                                                      | 1.732                                                                                                        | -2.76(2)                                |
| $x = 0.3$                                                            | 0.482(2)                                                     | 1.964                                                                                                      | 2.121                                                                                                        | -2.98(4)                                |
| $x = 0.4$                                                            | 0.719(1)                                                     | 2.398                                                                                                      | 2.449                                                                                                        | -8.69(3)                                |
| <b><math>\text{M} = \text{Fe}^{3+}</math></b>                        |                                                              |                                                                                                            |                                                                                                              |                                         |
| $x = 0.1$                                                            | 0.364(2)                                                     | 1.706                                                                                                      | 1.871                                                                                                        | -16.33(27)                              |
| $x = 0.2$                                                            | 0.789(4)                                                     | 2.512                                                                                                      | 2.646                                                                                                        | -44.57(35)                              |
| $x = 0.3$                                                            | 1.284(3)                                                     | 3.205                                                                                                      | 3.240                                                                                                        | -80.70(64)                              |
| $x = 0.4$                                                            | 1.642(1)                                                     | 3.624                                                                                                      | 3.742                                                                                                        | -108.66(36)                             |



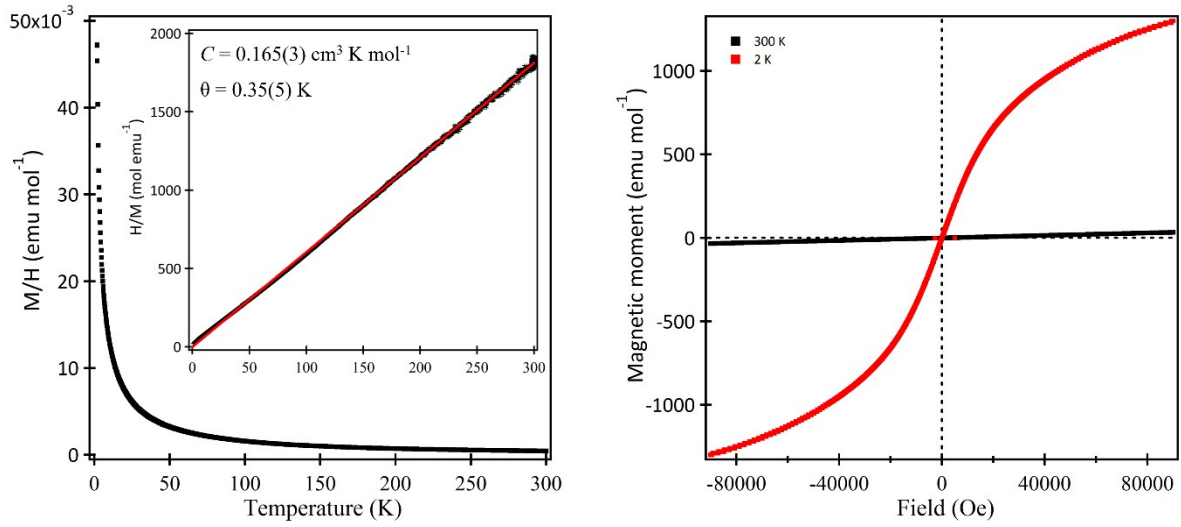

**Figure S4.** The magnetization data collected from  $\text{Sr}_2\text{Ga}_{0.9}\text{Cr}_{0.1}\text{SbO}_6$ .

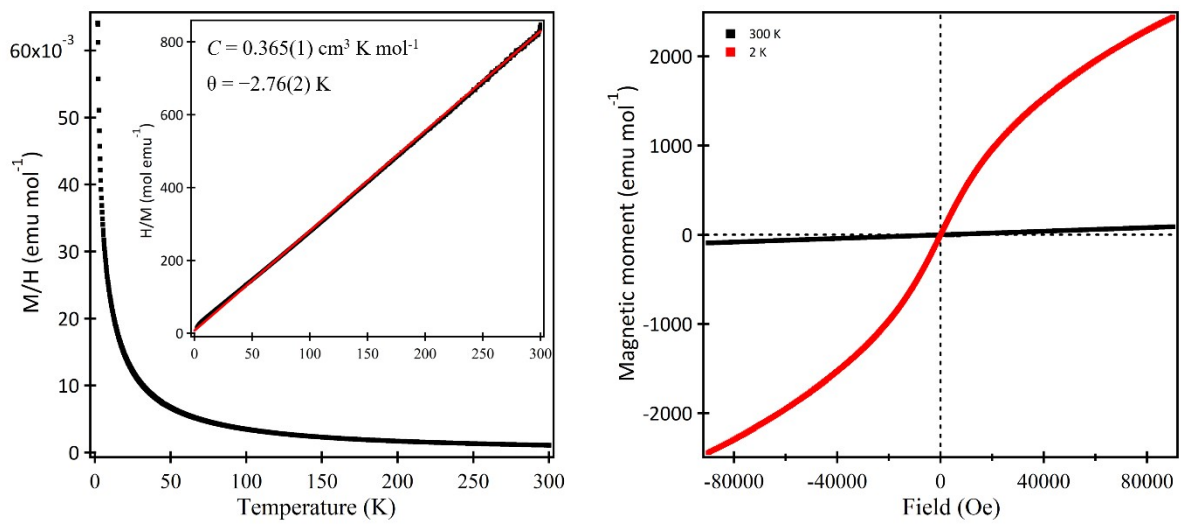

**Figure S5.** The magnetization data collected from  $\text{Sr}_2\text{Ga}_{0.8}\text{Cr}_{0.2}\text{SbO}_6$ .

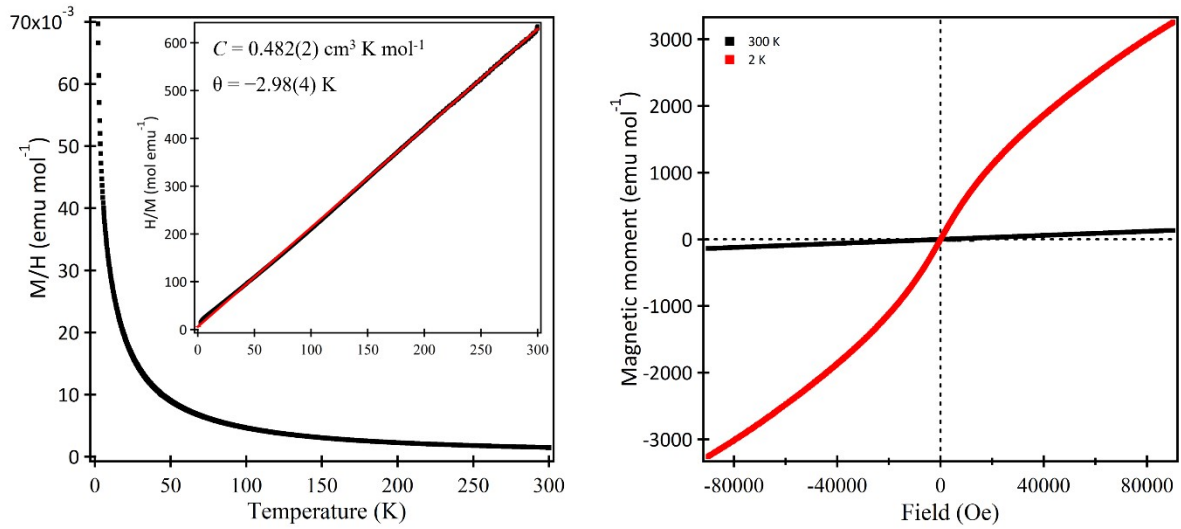

**Figure S6.** The magnetization data collected from  $\text{Sr}_2\text{Ga}_{0.7}\text{Cr}_{0.3}\text{SbO}_6$ .

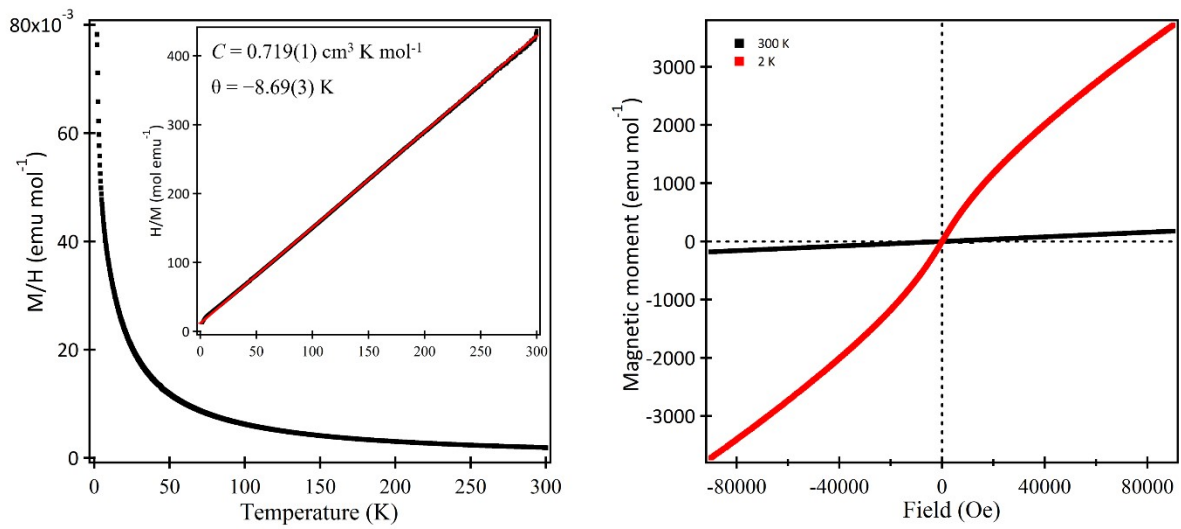

**Figure S7.** The magnetization data collected from  $\text{Sr}_2\text{Ga}_{0.6}\text{Cr}_{0.4}\text{SbO}_6$ .

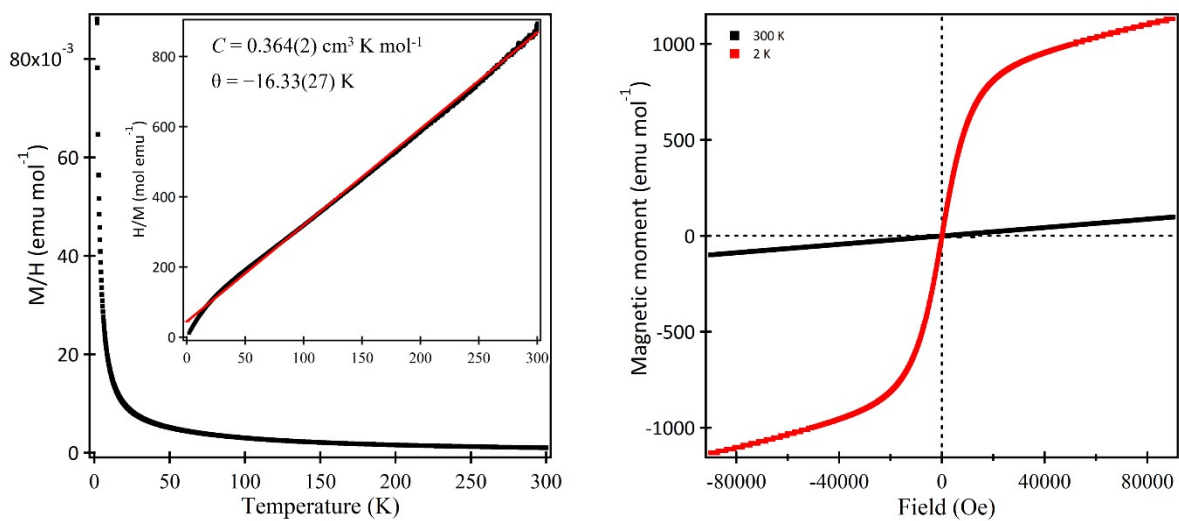

**Figure S8.** The magnetization data collected from  $\text{Sr}_2\text{Ga}_{0.9}\text{Fe}_{0.1}\text{SbO}_6$ .

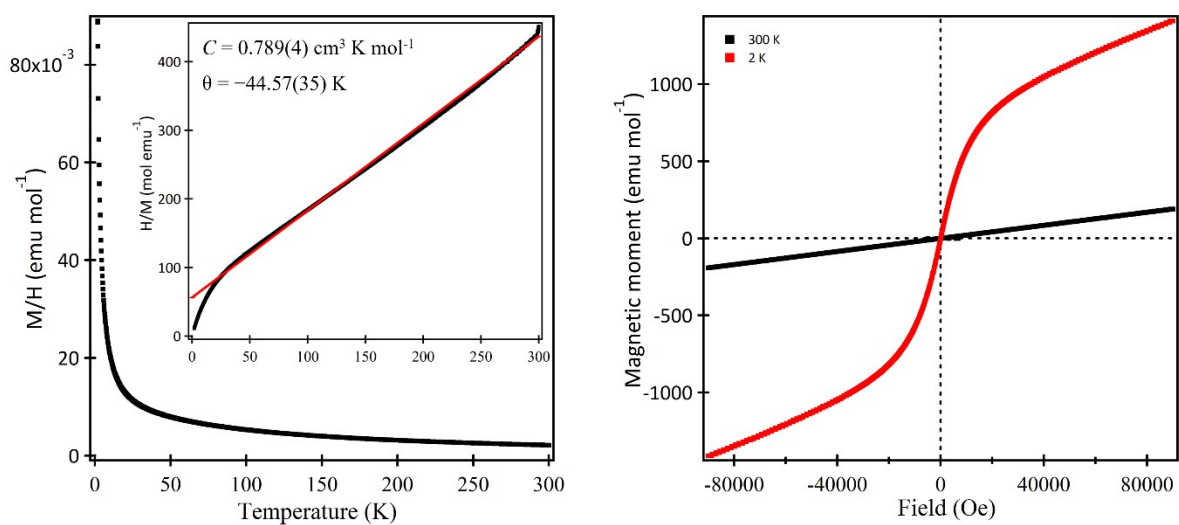

**Figure S9.** The magnetization data collected from  $\text{Sr}_2\text{Ga}_{0.8}\text{Fe}_{0.2}\text{SbO}_6$ .

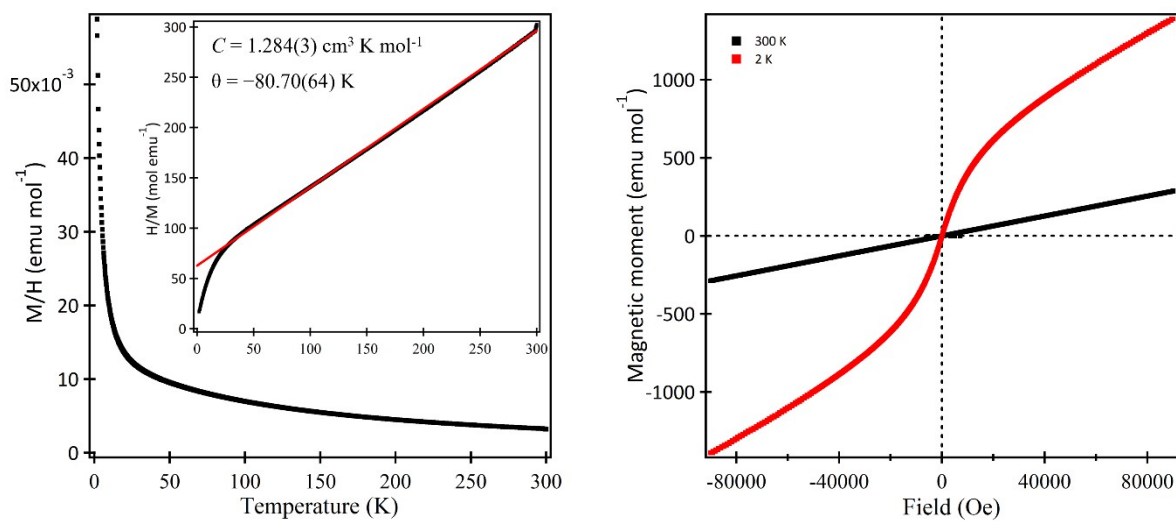

**Figure S10.** The magnetization data collected from  $\text{Sr}_2\text{Ga}_{0.7}\text{Fe}_{0.3}\text{SbO}_6$ .

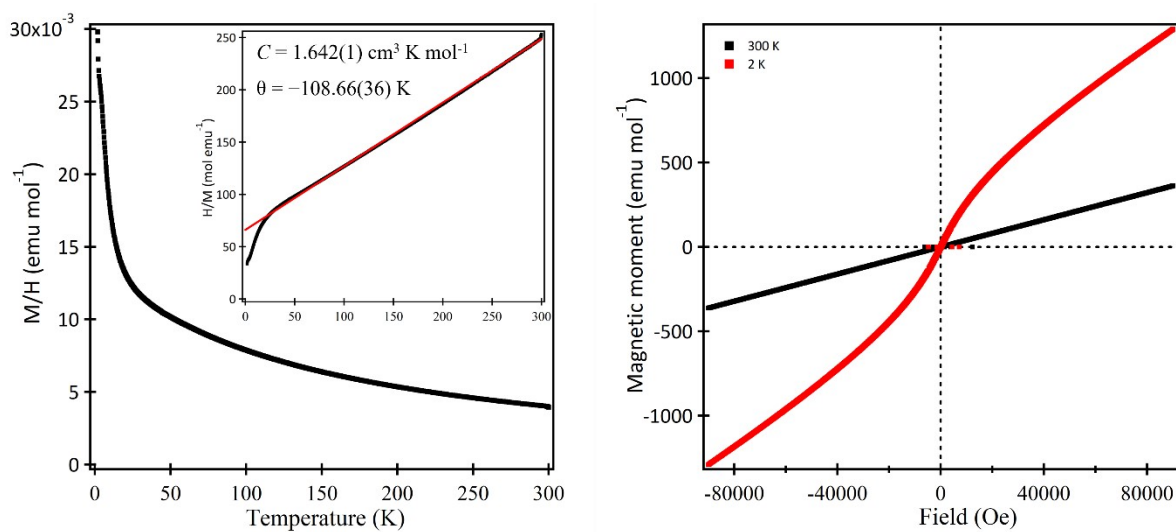

**Figure S11.** The magnetization data collected from  $\text{Sr}_2\text{Ga}_{0.6}\text{Fe}_{0.4}\text{SbO}_6$ .

#### 4. The calculated band gaps for all the double perovskites prepared in this study

**Table S4.** The calculated band gaps from Tauc plot by using both indirect and direct transition equation for all the double perovskites prepared in this study.

| Composition                                                       | Direct band gap (eV) | Indirect band gap (eV) |
|-------------------------------------------------------------------|----------------------|------------------------|
| <b>Sr<sub>2</sub>Ga<sub>1-x</sub>M<sub>x</sub>SbO<sub>6</sub></b> |                      |                        |
| <b>undoped</b>                                                    | 3.83                 | 3.52                   |
| <b>M = Cr<sup>3+</sup></b>                                        |                      |                        |
| <i>x</i> = 0.1                                                    | 3.80                 | 3.16                   |
| <i>x</i> = 0.2                                                    | 3.76                 | 2.88                   |
| <i>x</i> = 0.3                                                    | 3.33                 | 2.55                   |
| <i>x</i> = 0.4                                                    | 3.47                 | 2.86                   |
| <b>M = Fe<sup>3+</sup></b>                                        |                      |                        |
| <i>x</i> = 0.1                                                    | 3.51                 | 3.24                   |
| <i>x</i> = 0.2                                                    | 3.43                 | 3.13                   |
| <i>x</i> = 0.3                                                    | 3.33                 | 2.97                   |
| <i>x</i> = 0.4                                                    | 3.27                 | 2.85                   |
